# Supplementary material
Source: PubMed Central journal article supplement (PMC5172595)
Supplement: NIHMS833718-supplement-supple_files.pdf [file NIHMS833718-supplement-supple_files.pdf]

## Supplementary Online Content

Middeldorp J, Lehallier B, Villeda SA, et al. Preclinical assessment of young blood plasma for Alzheimer disease. *JAMA Neurol*. Published online September 6, 2016. doi:10.1001/jamaneurol.2016.3185

**eFigure 1** Female APP MICE SHOW MORE HIPPOCAMPAL A $\beta$  Deposits at Middle-Age Than Male APP Mice

**eFigure 2** Heterochronic Parabiosis Does Not Affect A $\beta$  Levels in the Hippocampus

**eFigure 3** Heterochronic Parabiosis and Administration of Young Blood Plasma Does Not Affect CD68 Immunoreactivity in the Hippocampus of APP Mice

**eFigure 4** Whole Genome Microarray Analysis on the Hippocampi of Middle-aged Female WT iso (n = 6), APP iso (n = 7) and APP het (n = 7) Parabionts

**eFigure 5** Top Gene Ontology Terms of the Top 100 Differentially Expressed Genes

**eFigure 6** Administration of Young Blood Plasma Reverses Neocortical Synaptophysin Depletion

**eTable 1** Top 100 Metaranked Genes

This supplementary material has been provided by the authors to give readers additional information about their work.

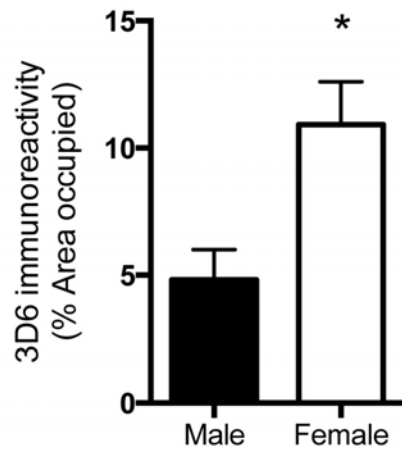

**eFigure 1 Female APP mice show more hippocampal A $\beta$  deposits at middle-age than male APP mice**

Quantification of 3D6 immunoreactivity in the hippocampi of 10-12 month old male and female APP mice. Data are shown as the mean + s.e.m., \* P < 0.05, Student's t test.

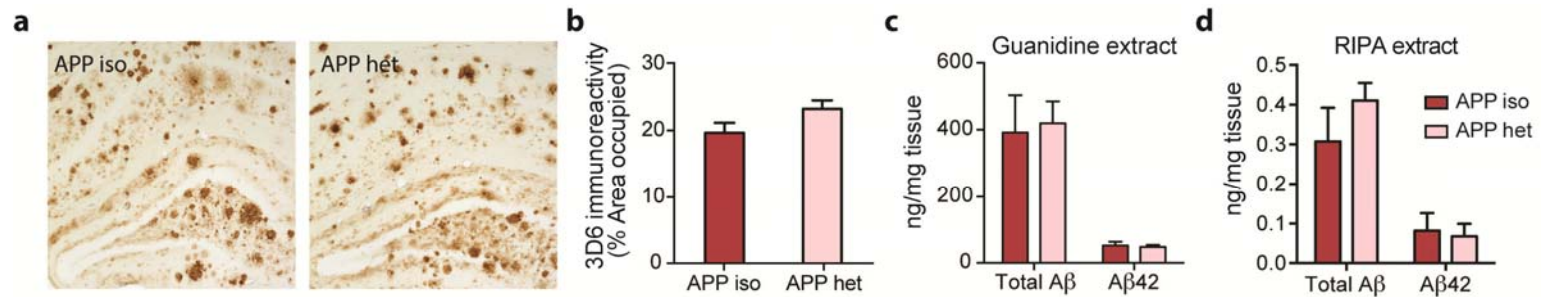

### eFigure 2 Heterochronic parabiosis does not affect Aβ levels in the hippocampus

Representative images (a) and quantification (b) of immunohistochemical detection of amyloid plaques (3D6 staining) in the hippocampus of APP iso and APP het parabionts. (c-d) ELISA measurements of insoluble (c) and soluble (d) total Aβ and Aβ42 levels in the hippocampus of old male APP iso and APP het parabionts. All data are shown as the mean + s.e.m. Student's t test (b), two-way ANOVA, Sidak's post hoc test (d-e), one-way ANOVA, Tukey's post hoc test (g-h,j). Scale bars, 100μm (f), 25μm (i).

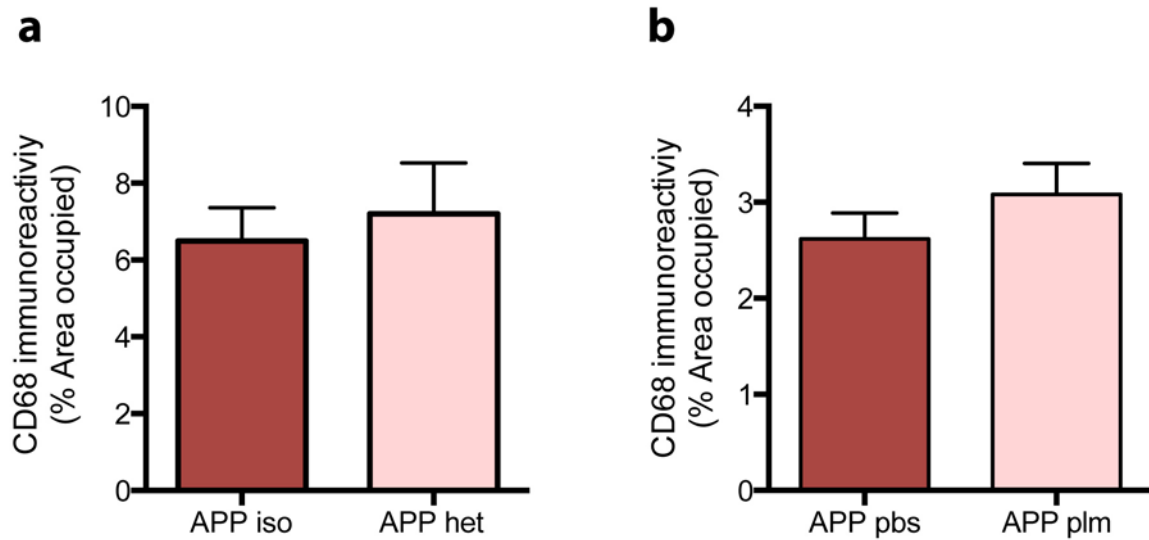

**Figure 3 Heterochronic parabiosis and administration of young blood plasma does not affect CD68 immunoreactivity in the hippocampus of APP mice**

Quantification of CD68 immunoreactivity in the hippocampi of old APP iso and APP het parabionts (a) and middle-aged APP mice treated with either PBS or young plasma (b); APP iso (n = 5), APP het (n = 4), APP pbs (n=12), APP plm (n=12). Data are shown as the mean + s.e.m., Student's t test.

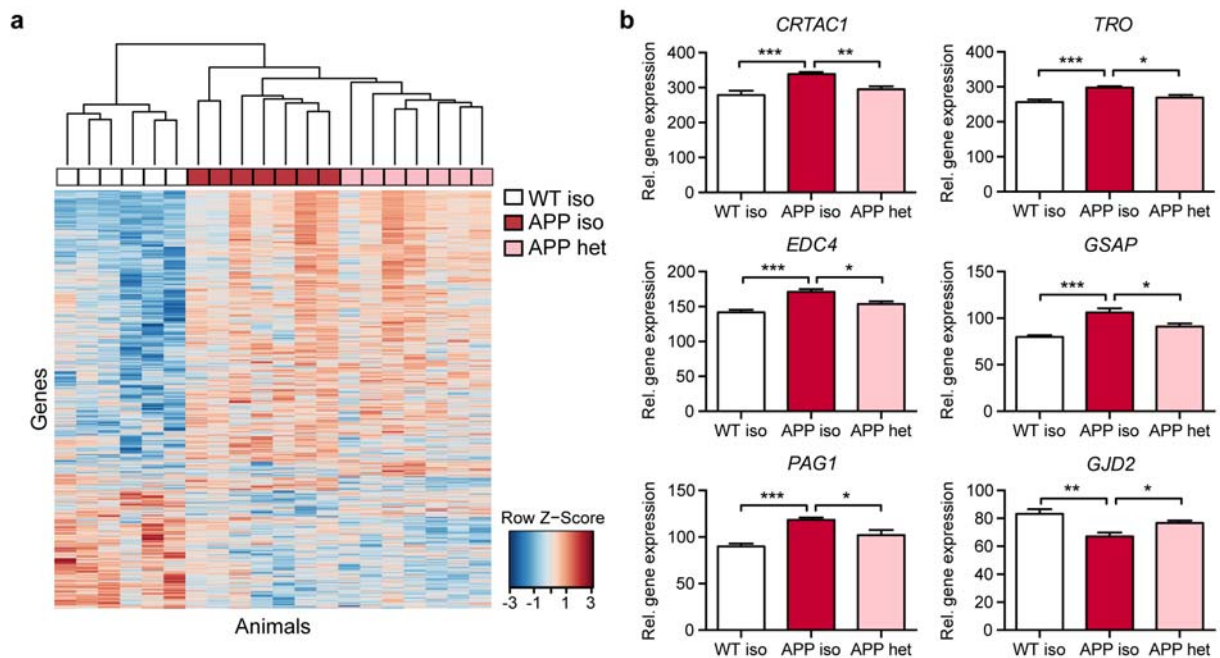

**Figure 4 Whole genome microarray analysis on the hippocampi of middle-aged female WT iso (n = 6), APP iso (n = 7) and APP het (n = 7) parabionts**

(a) Heat map generated by unsupervised hierarchical clustering based on differentially expressed genes using Significant Analysis of Microarray (SAM,  $q < 0.05$ ). This illustrates that the three groups are perfectly separated, and differences in gene expression are most evident between WT iso parabionts and both APP groups and less noticeable between APP iso and APP het parabionts. Color bars reflect the z scores with downregulated genes shown in shades of blue, and upregulated genes shown in shades of red. (b) 6 out of 8 genes that were significantly different when comparing all 3 groups in Significance Analysis of Microarrays (SAM,  $q < 0.05$ ) followed by Tukey Honestly Significant Difference (HSD,  $P < 0.05$ ) showed a pattern in which expression levels of APP het parabionts were reversed to WT iso levels. These genes were cartilage acidic protein 1 (Crtac1), trophinin (Tro), enhancer of mRNA decapping 4 (Edc4),  $\gamma$ -secretase activating protein (GSAP), phosphoprotein associated with glycosphingolipid microdomains 1 (PAG1), and gap junction protein, delta 2, 36kDa (Gjd2) for which relative gene expression is presented here. The values represent normalized values using robust multi-array average method (RMA)(Yamin 2009; Irizarry et al. 2003). All data are shown as the mean + s.e.m. \*  $P < 0.05$ , \*\*  $P < 0.01$ , \*\*\* $P < 0.001$ , one-way ANOVA, Tukey's post hoc test (b).

eFigure 5

a) APP iso versus WT iso

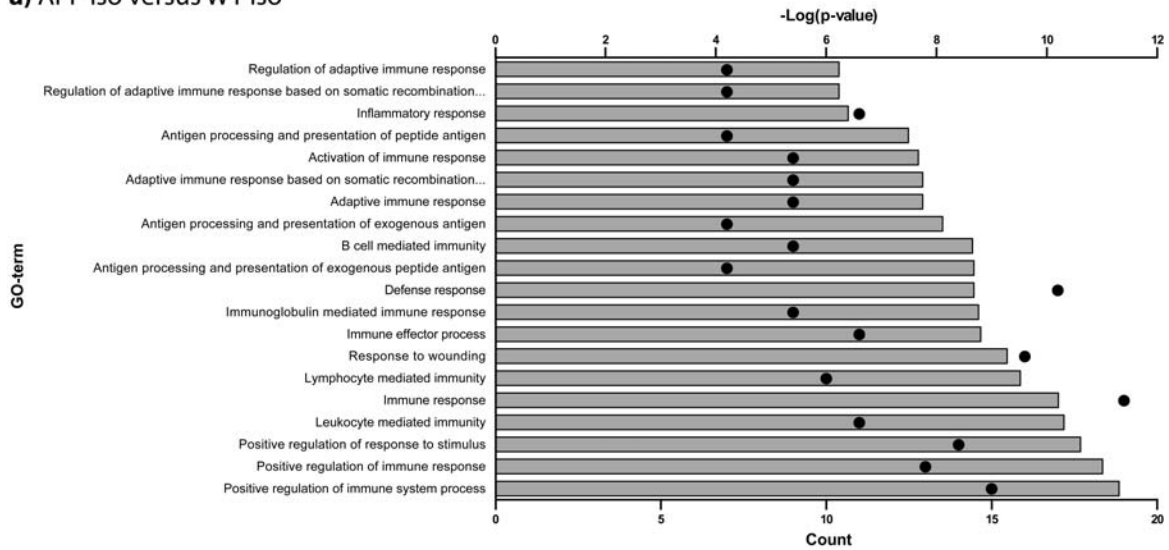

b) APP iso versus APP het

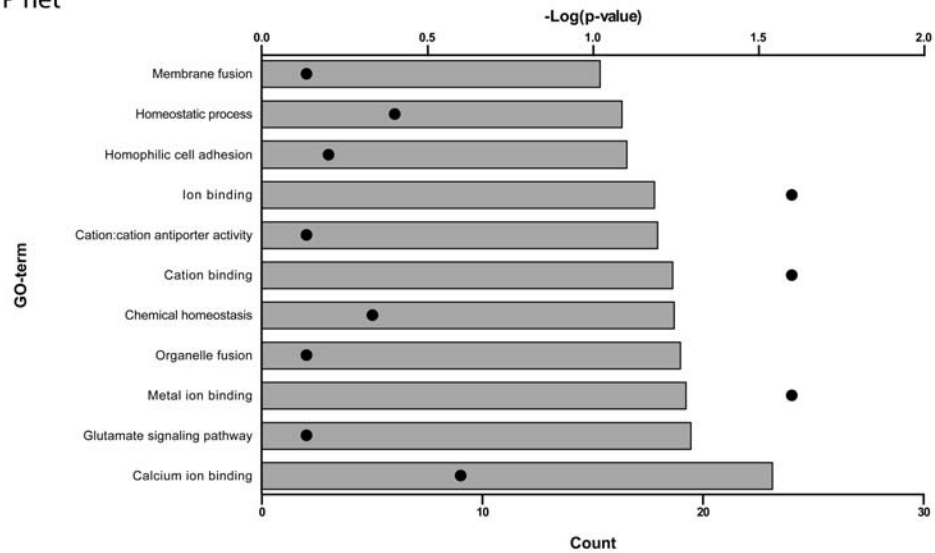

**eFigure 5 Top gene ontology terms of the top 100 differentially expressed genes**

The top 100 differentially expressed genes between hippocampi of APP iso and WT iso (a), and of APP iso and APP het (b) parabionts according to SAM ( $P < 0.05$ ) were analyzed using the online gene ontology tool DAVID for gene ontology term (GO-term) annotation categories 'Biological Process', and 'Molecular Function'. (a) This graph represents the top 20 all GO-terms with  $P < 0.05$  (195 total) for differentially expressed genes between APP iso and WT iso hippocampi. (b) This graph represents all GO-terms with  $P < 0.1$  (only calcium ion binding is  $< 0.05$ ) for differentially expressed genes between APP iso and APP het hippocampi. Gray bars represent the p-values and the black dots represent the number of genes in each category.

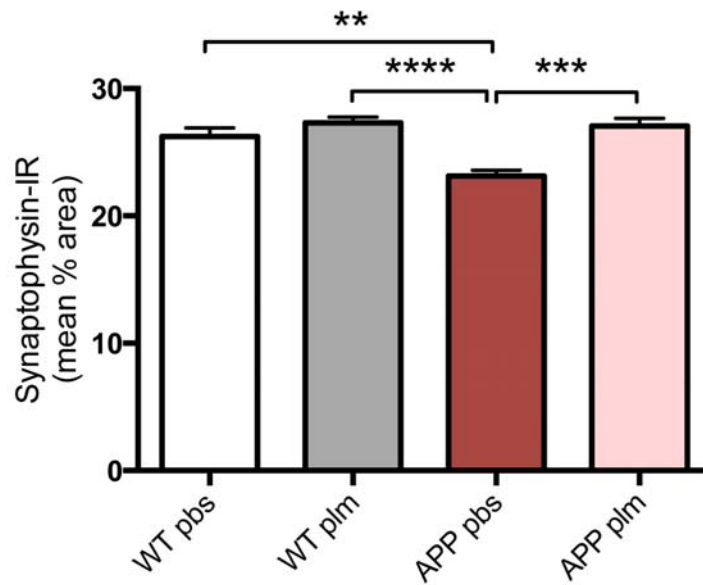

**eFigure 6 Administration of young blood plasma reverses neocortical synaptophysin depletion**

Quantification of synaptophysin immunoreactivity in the neocortex of WT pbs (n = 14), WT plm (n = 13), APP pbs (n = 11) and APP plm (n = 13) mice. Data are shown as the mean + s.e.m., \*\* P < 0.01, \*\*\* P < 0.001, \*\*\*\* P < 0.0001, one-way ANOVA.

# eTable 1

eTable 1. Top 100 metaranked genes

| Metarank | GeneSymbol    | Score       | Rank t-test | Rank Anova | Rank Enets | Rank Lasso | Rank Log fold change | P-value t-test | log fold change | P-value Anova |
|----------|---------------|-------------|-------------|------------|------------|------------|----------------------|----------------|-----------------|---------------|
| 1        | Atp6v1g2      | 5,93E-08    | 1           | na         | 1          | 1          | 510                  | 7,08E-05       | -0.151456796    | na            |
| 2        | Vps37b        | 2,84E-07    | 2           | na         | 2          | na         | 165                  | 0,000290503    | -0.209316853    | na            |
| 3        | Zkscan14      | 5,25E-07    | 3           | na         | 3          | 2          | 234                  | 0,000433717    | -0.192731666    | na            |
| 4        | Mir763        | 5,41E-07    | 24          | na         | 20         | na         | 2                    | 0,002538997    | -0.533156486    | na            |
| 5        | Rbmw2         | 1,53E-06    | 4           | na         | 3          | 4          | 154                  | 0,000598608    | -0.211876671    | na            |
| 6        | Foxq1         | 4,32E-06    | 16          | na         | 14         | na         | 41                   | 0,001720412    | -0.304623385    | na            |
| 7        | Ccdc117       | 4,38E-06    | 5           | na         | 5          | 3          | 571                  | 0,000729108    | -0.146072907    | na            |
| 8        | H2afb2-ps     | 6,44E-06    | 17          | na         | 32         | na         | 28                   | 0,00194143     | 0,33413137      | na            |
| 9        | Lrrc51        | 6,81E-06    | 7           | na         | 7          | na         | 273                  | 0,000835865    | 0,184288884     | na            |
| 10       | Lamp2         | 1,01E-05    | 11          | na         | 8          | na         | 219                  | 0,001210884    | 0,196651683     | na            |
| 11       | Tnip2         | 1,10E-05    | 23          | na         | na         | na         | 44                   | 0,002390539    | -0.296207029    | na            |
| 12       | Foxl1         | 1,12E-05    | 29          | na         | 20         | na         | 46                   | 0,002961311    | 0,294086598     | na            |
| 13       | Pcdh8         | 1,20E-05    | 30          | na         | na         | na         | 42                   | 0,002968683    | -0.300864394    | na            |
| 14       | Tmem242       | 1,31E-05    | 8           | na         | 12         | na         | 253                  | 0,001118232    | -0.187706159    | na            |
| 15       | Crtac1        | 1,55E-05    | 15          | na         | 10         | na         | 195                  | 0,001561958    | -0.201500627    | na            |
| 16       | 1110038F14Rik | 1,74E-05    | 13          | na         | 9          | 5          | 199                  | 0,001504491    | -0.199913435    | na            |
| 17       | Fam76b        | 1,94E-05    | 14          | na         | 14         | na         | 149                  | 0,001517477    | -0.213929238    | na            |
| 18       | Ppnr          | 2,22E-05    | 51          | na         | na         | na         | 55                   | 0,00500356     | 0,280181426     | na            |
| 19       | Cln3          | 2,79E-05    | 25          | na         | 28         | na         | 74                   | 0,002597457    | -0.255403031    | na            |
| 20       | Mir187        | 3,33E-05    | 82          | na         | na         | na         | 35                   | 0,007660818    | -0.315093131    | na            |
| 21       | Clic6         | 3,40E-05    | 2303        | na         | na         | na         | 1                    | 0,185989679    | 0,59441925      | na            |
| 22       | Susd1         | 3,85E-05    | 9           | na         | 43         | na         | 171                  | 0,00112143     | -0.207457242    | na            |
| 23       | Ncapd3        | 3,89E-05    | 6           | na         | 5          | 6          | 1573                 | 0,000751553    | -0.100169237    | na            |
| 24       | Snord83b      | 3,97E-05    | 124         | na         | na         | na         | 24                   | 0,01005379     | -0.364963695    | na            |
| 25       | Plscr3        | 5,05E-05    | 56          | na         | na         | na         | 89                   | 0,005182506    | 0,243098951     | na            |
| 26       | BC002059      | 5,07E-05    | 84          | na         | na         | na         | 70                   | 0,007836585    | -0.258433344    | na            |
| 27       | Gpn3          | 5,41E-05    | 10          | na         | 10         | 8          | 410                  | 0,001124974    | -0.163302783    | na            |
| 28       | Cngb1         | 5,66E-05    | 38          | na         | 34         | na         | 81                   | 0,003799683    | 0,247202594     | na            |
| 29       | Cited4        | 6,47E-05    | 85          | na         | na         | na         | 94                   | 0,007845531    | 0,238436812     | na            |
| 30       | Rab40b        | 6,72E-05    | 22          | na         | 18         | na         | 316                  | 0,002271841    | -0.176741493    | na            |
| 31       | Btg2          | 6,84E-05    | 122         | na         | na         | na         | 47                   | 0,0097588      | -0.293544323    | na            |
| 32       | Mir1963       | 7,28E-05    | 498         | na         | na         | na         | 10                   | 0,039498656    | -0.43077331     | na            |
| 33       | Hscb          | 7,38E-05    | 100         | na         | na         | na         | 97                   | 0,008455852    | -0.235652124    | na            |
| 34       | Ccdc3         | 7,57E-05    | 110         | na         | na         | na         | 67                   | 0,009005486    | 0,259932846     | na            |
| 35       | Cdh7          | 7,58E-05    | 168         | na         | na         | na         | 34                   | 0,013301289    | 0,320656746     | na            |
| 36       | Ccnj          | 7,63E-05    | 33          | na         | 24         | na         | 177                  | 0,003179812    | -0.205373839    | na            |
| 37       | Homer3        | 8,07E-05    | 52          | na         | 26         | na         | 129                  | 0,005032139    | -0.218352782    | na            |
| 38       | 1700013F07Rik | 8,39E-05    | 111         | na         | na         | na         | 80                   | 0,009009831    | 0,247528904     | na            |
| 39       | Tmem175       | 8,56E-05    | 18          | na         | 14         | na         | 580                  | 0,001986084    | -0.145490337    | na            |
| 40       | Hs3t4         | 8,66E-05    | 12          | na         | 18         | na         | 742                  | 0,001434307    | -0.134441858    | na            |
| 41       | Slc9a2        | 8,98E-05    | 118         | na         | na         | na         | 76                   | 0,009358834    | -0.252648278    | na            |
| 42       | Rps12l2       | 9,02E-05    | 2038        | na         | na         | na         | 3                    | 0,161918391    | -0.51623016     | na            |
| 43       | Smoc2         | 9,31E-05    | 50          | na         | na         | na         | 151                  | 0,004905336    | -0.213099953    | na            |
| 44       | Mir297a-4     | 9,61E-05    | 817         | na         | na         | na         | 8                    | 0,064471492    | 0,443412054     | na            |
| 45       | Aagab         | 0,000104511 | 21          | na         | 20         | na         | 399                  | 0,002129926    | -0.164701325    | na            |
| 46       | Rabggtb       | 0,00010744  | 206         | na         | na         | na         | 39                   | 0,016525481    | -0.306240698    | na            |
| 47       | Ptchd4        | 0,000108755 | 125         | na         | na         | na         | 95                   | 0,010081287    | -0.238387003    | na            |
| 48       | Syne1         | 0,000113068 | 81          | na         | na         | na         | 135                  | 0,007633158    | -0.217181591    | na            |
| 49       | Rpp40         | 0,000119117 | 148         | na         | na         | na         | 72                   | 0,011787889    | 0,257095381     | na            |
| 50       | Gpr88         | 0,000122485 | 697         | na         | na         | na         | 12                   | 0,054245087    | 0,427453899     | na            |
| 51       | Usp50         | 0,000122898 | 162         | na         | na         | na         | 64                   | 0,012914113    | 0,263657949     | na            |
| 52       | Lrrc48        | 0,000131348 | 36          | na         | na         | na         | 265                  | 0,003623412    | 0,186078748     | na            |
| 53       | Irf2bp2       | 0,000134715 | 137         | na         | na         | na         | 114                  | 0,01087471     | 0,224553952     | na            |
| 54       | Syne1         | 0,000135513 | 66          | na         | na         | na         | 172                  | 0,006514335    | -0.207159618    | na            |
| 55       | Sfil1         | 0,000140565 | 78          | na         | na         | na         | 161                  | 0,007533184    | 0,210329959     | na            |
| 56       | Dusp1         | 0,00014072  | 167         | na         | na         | na         | 73                   | 0,01329043     | -0.256226984    | na            |
| 57       | Zic1          | 0,000147123 | 1663        | na         | na         | na         | 6                    | 0,132137928    | 0,477710014     | na            |
| 58       | Arsj          | 0,000152892 | 145         | na         | na         | na         | 127                  | 0,011528094    | -0.218417115    | na            |
| 59       | Irga8         | 0,000159851 | 42          | na         | 43         | na         | 173                  | 0,0040835      | -0.20644528     | na            |
| 60       | Mrp110        | 0,000160477 | 112         | na         | na         | na         | 153                  | 0,009079667    | 0,212072592     | na            |
| 61       | Vat1l         | 0,000161105 | 997         | na         | na         | na         | 11                   | 0,0782966      | 0,429069158     | na            |
| 62       | Myog          | 0,000166976 | 332         | na         | na         | na         | 36                   | 0,027506038    | 0,314075462     | na            |
| 63       | 1700011M02Rik | 0,000171075 | 562         | na         | na         | na         | 21                   | 0,043761334    | -0.378260253    | na            |
| 64       | Gpld1         | 0,000174746 | 156         | na         | na         | na         | 130                  | 0,012435193    | -0.2181668      | na            |
| 65       | Fut11         | 0,000177516 | 642         | na         | na         | na         | 19                   | 0,050437153    | -0.387937388    | na            |
| 66       | Pcdhb7        | 0,000181689 | 173         | na         | na         | na         | 100                  | 0,013787554    | -0.234250363    | na            |
| 67       | Wdr78         | 0,000182597 | 67          | na         | na         | na         | 218                  | 0,006648805    | 0,196782266     | na            |
| 68       | Prss35        | 0,000192767 | 254         | na         | na         | na         | 58                   | 0,02115949     | -0.275687823    | na            |
| 69       | Chchd4        | 0,000193706 | 20          | na         | 12         | 7          | 843                  | 0,002054614    | -0.128620067    | na            |
| 70       | Sinx22        | 0,000195389 | 143         | na         | na         | na         | 164                  | 0,011420846    | -0.209569052    | na            |
| 71       | Kcnk13        | 0,000196187 | 101         | na         | na         | na         | 182                  | 0,008461553    | 0,204601511     | na            |
| 72       | Mir3091       | 0,000204437 | 366         | na         | na         | na         | 40                   | 0,030272566    | 0,305931603     | na            |
| 73       | Mir574        | 0,000205441 | 385         | na         | na         | na         | 38                   | 0,032246633    | 0,309816266     | na            |
| 74       | Zfp14         | 0,000205788 | 149         | na         | na         | na         | 168                  | 0,011861308    | 0,208510881     | na            |
| 75       | Zfp160        | 0,000210877 | 86          | na         | na         | na         | 209                  | 0,007850148    | -0.198319728    | na            |
| 76       | Apbb3         | 0,000211342 | 97          | na         | na         | na         | 196                  | 0,008225952    | -0.200848101    | na            |
| 77       | Mfsd3         | 0,000218049 | 26          | na         | 71         | na         | 215                  | 0,00262774     | 0,196908952     | na            |
| 78       | Cdr1          | 0,000218056 | 682         | na         | na         | na         | 22                   | 0,052745042    | -0.372974122    | na            |
| 79       | Pdcd2l        | 0,000224083 | 74          | na         | na         | na         | 242                  | 0,007322885    | -0.190394131    | na            |
| 80       | Chsy3         | 0,000233336 | 54          | na         | 34         | na         | 235                  | 0,005074929    | 0,192158164     | na            |
| 81       | Cutc          | 0,0002385   | 186         | na         | na         | na         | 138                  | 0,014693656    | -0.216500237    | na            |
| 82       | Mettl7a3      | 0,000242724 | 645         | na         | na         | na         | 26                   | 0,050590867    | -0.346991409    | na            |
| 83       | Prrm3         | 0,00024485  | 39          | na         | 50         | na         | 227                  | 0,00391332     | 0,195039072     | na            |
| 84       | Syne1         | 0,000255014 | 105         | na         | 50         | na         | 134                  | 0,008820386    | -0.217590508    | na            |
| 85       | Mettl24       | 0,000257909 | 180         | na         | na         | na         | 187                  | 0,014437626    | -0.203576161    | na            |
| 86       | Gpc4          | 0,000268168 | 197         | na         | na         | na         | 147                  | 0,015818613    | -0.214603104    | na            |
| 87       | 1500015O10Rik | 0,000280894 | 4756        | na         | na         | na         | 4                    | 0,39466748     | 0,51224752      | na            |
| 88       | Rras2         | 0,00028142  | 27          | na         | 50         | na         | 318                  | 0,002780031    | -0.176354371    | na            |
| 89       | Vav3          | 0,000294247 | 226         | na         | na         | na         | 120                  | 0,018666935    | -0.223402171    | na            |
| 90       | Gpr50         | 0,000294712 | 212         | na         | na         | na         | 141                  | 0,017077958    | 0,215837763     | na            |
| 91       | Hist3h2a      | 0,000295008 | 368         | na         | na         | na         | 59                   | 0,030664681    | -0.273666752    | na            |
| 92       | Zfp263        | 0,000300768 | 202         | na         | na         | na         | 193                  | 0,016188525    | -0.202832455    | na            |
| 93       | Gjd2          | 0,000304882 | 172         | na         | na         | na         | 206                  | 0,013758512    | 0,198953068     | na            |
| 94       | Rnaseh2a      | 0,000306507 | 166         | na         | na         | na         | 208                  | 0,013223318    | -0.198655931    | na            |
| 95       | 1700003M02Rik | 0,000328849 | 903         | na         | na         | na         | 25                   | 0,07049866     | 0,356428675     | na            |
| 96       | Lhp           | 0,000334551 | 3239        | na         | na         | na         | 7                    | 0,268385546    | 0,446704304     | na            |
| 97       | Ccnj1         | 0,000341279 | 152         | na         | na         | na         | 228                  | 0,012023102    | -0.194786317    | na            |
| 98       | 6030419C18Rik | 0,000347599 | 37          | na         | 20         | na         | 846                  | 0,003729345    | -0.12854863     | na            |
| 99       | Syne1         | 0,000353562 | 220         | na         | na         | na         | 197                  | 0,017879848    | -0.200262091    | na            |
| 100      | Rassf5        | 0,000356957 | 32          | na         | 28         | na         | 756                  | 0,00308856     | 0,134038637     | na            |
